# Supplementary material for: Anti-Melanoma Effects of Miconazole: Investigating the Mitochondria Involvement
Source: MDPI journal article supplement (doi:10.3390/ijms25073589), 2024-03-22
Supplement: s1 [file s1]

Not shown material

Supplementary Figure S1

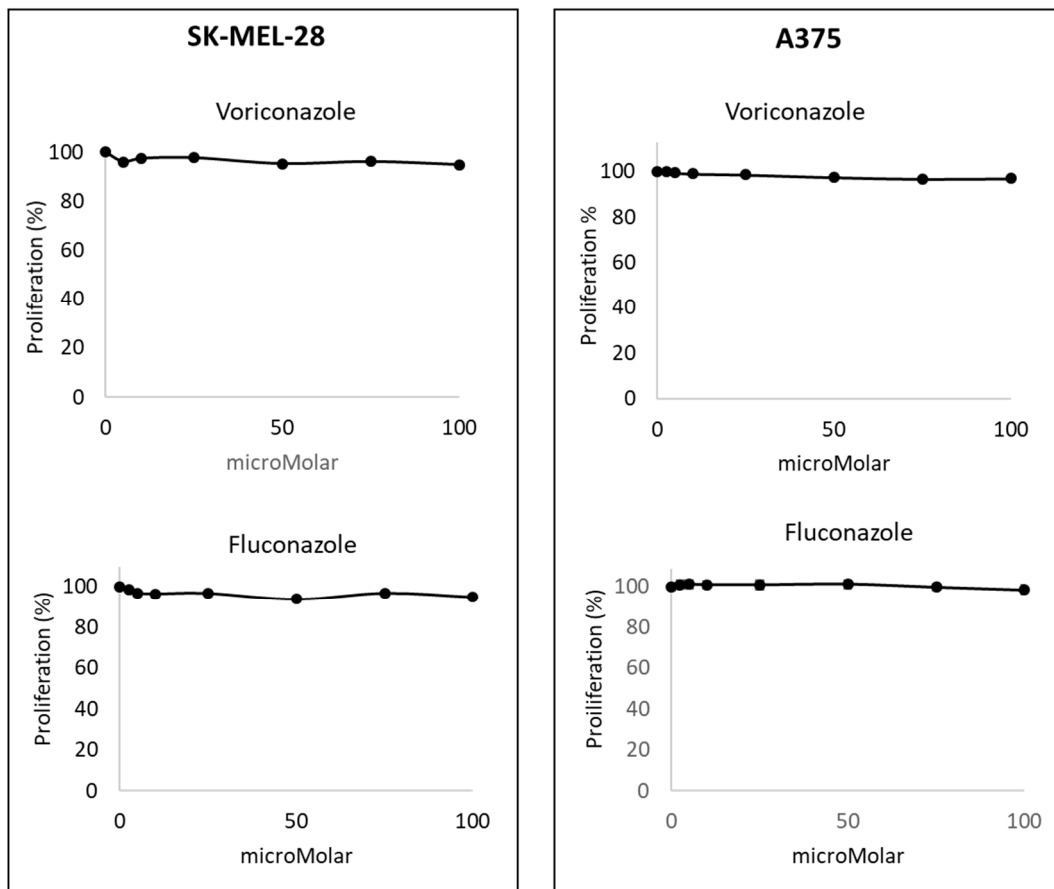

Figure S1 Supplementary. Effect of voriconazole and fluconazole on A375 and SK-MEL-28 cells proliferation, induced by serum.

Supplementary Figure S2

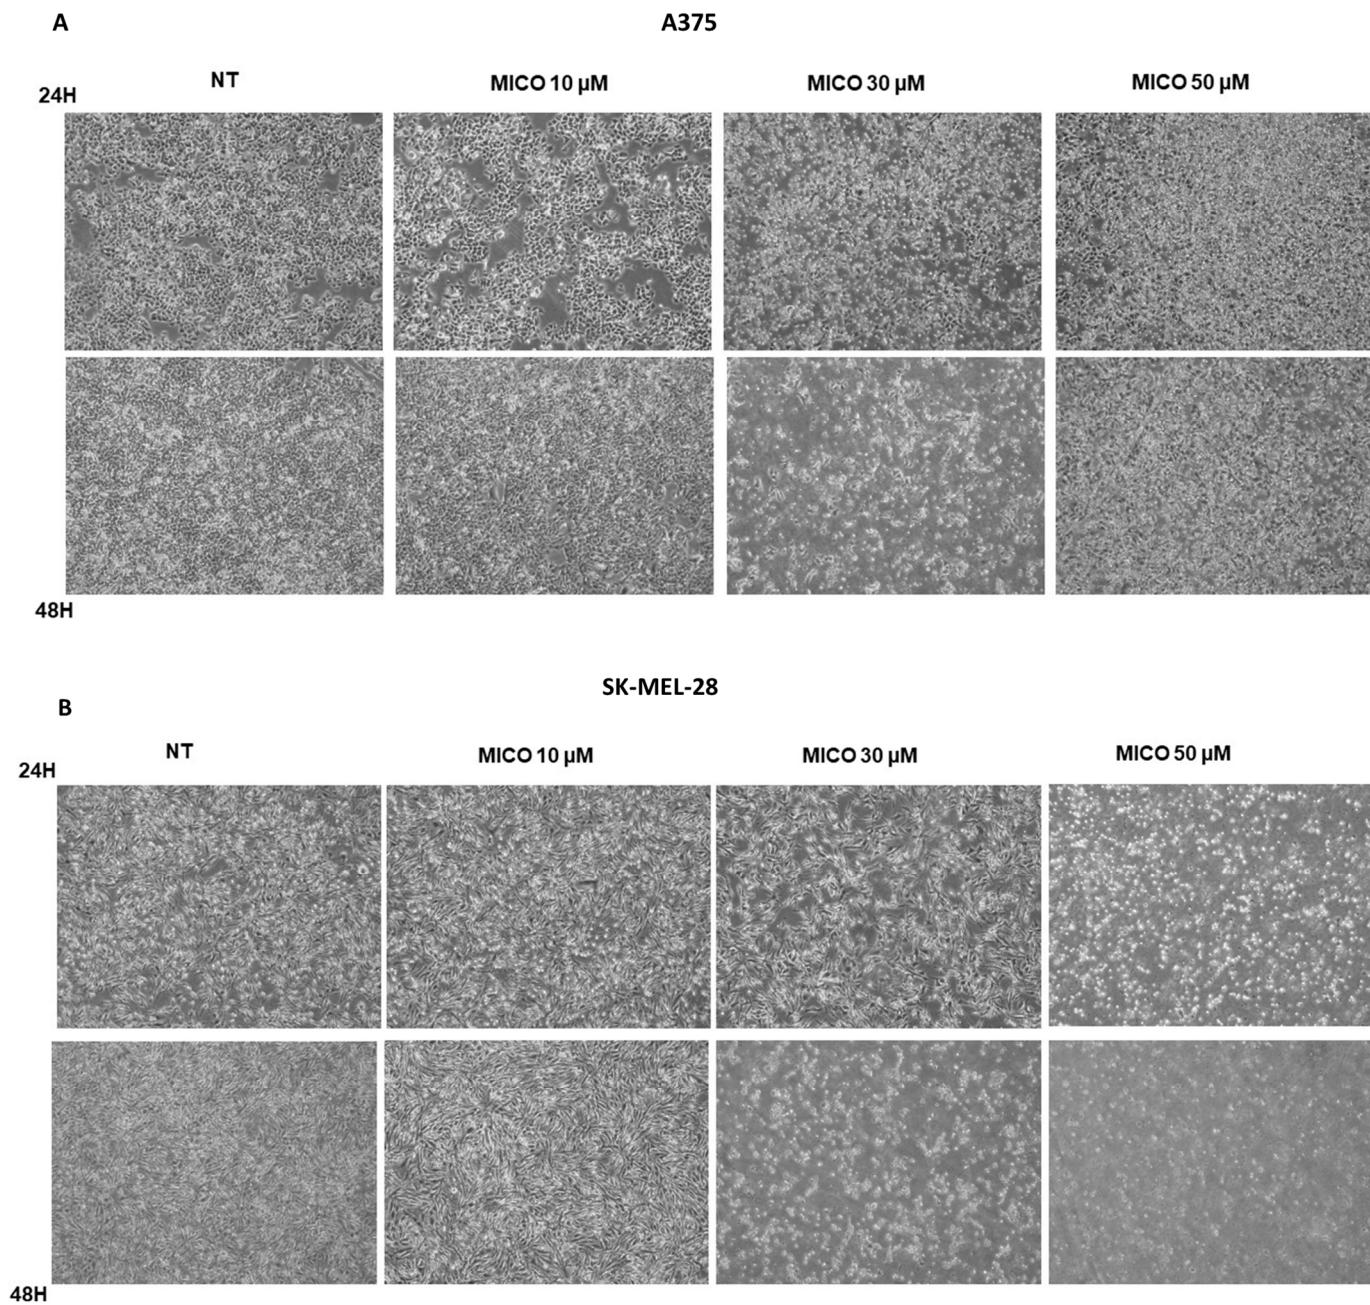

Figure S2 Supplementary. Microphotographs of A375 and SK-MEL-28 melanoma cell lines, treated with DMSO only (NT) or with increasing doses of miconazole. Magnification 10 $\times$ . (A) after A375, and (B) after SK-MEL-28.

**Table S1 not shown:** list of 443 metabolites measured.

| N. | Code       | Analyte Class      | Analyte Name                |
|----|------------|--------------------|-----------------------------|
| 1  | C0         | Acylcarnitines     | Carnitine                   |
| 2  | C2         | Acylcarnitines     | Acetylcarnitine             |
| 3  | C3         | Acylcarnitines     | Propionylcarnitine          |
| 4  | C4         | Acylcarnitines     | Butyrylcarnitine            |
| 5  | C5         | Acylcarnitines     | Valerylcarnitine            |
| 6  | 1-Met-His  | Amino acid related | 1-Methylhistidine           |
| 7  | 3-Met-His  | Amino acid related | 3-Methylhistidine           |
| 8  | 5-AVA      | Amino acid related | 5-Aminovaleric acid         |
| 9  | AABA       | Amino acid related | alpha-Amino-butyric acid    |
| 10 | ADMA       | Amino acid related | Asymmetric dimethylarginine |
| 11 | alpha-AAA  | Amino acid related | alpha-Aminoadipic acid      |
| 12 | Anserine   | Amino acid related | L-Anserine                  |
| 13 | BABA       | Amino acid related | beta-Aminobutyric acid      |
| 14 | Betaine    | Amino acid related | Betaine                     |
| 15 | Carnosine  | Amino acid related | Carnosine                   |
| 16 | Cit        | Amino acid related | Citrulline                  |
| 17 | Cystine    | Amino acid related | Cystine                     |
| 18 | HArg       | Amino acid related | Homoarginine                |
| 19 | HCys       | Amino acid related | Homocysteine                |
| 20 | Kynurenine | Amino acid related | Kynurenine                  |
| 21 | Met-SO     | Amino acid related | Methionine-Sulfoxide        |
| 22 | Orn        | Amino acid related | Ornithine                   |
| 23 | PAG        | Amino acid related | Phenylacetyl-glycine        |
| 24 | ProBetaine | Amino acid related | Proline betaine             |
| 25 | Sarcosine  | Amino acid related | Sarcosine                   |
| 26 | SDMA       | Amino acid related | Symmetric dimethylarginine  |
| 27 | t4-OH-Pro  | Amino acid related | trans-4-Hydroxyproline      |
| 28 | Taurine    | Amino acid related | Taurine                     |
| 29 | Ala        | Amino acids        | Alanine                     |
| 30 | Arg        | Amino acids        | Arginine                    |
| 31 | Asn        | Amino acids        | Asparagine                  |
| 32 | Asp        | Amino acids        | Aspartic acid               |
| 33 | Cys        | Amino acids        | Cysteine                    |
| 34 | Gln        | Amino acids        | Glutamine                   |
| 35 | Glu        | Amino acids        | Glutamic acid               |
| 36 | Gly        | Amino acids        | Glycine                     |
| 37 | His        | Amino acids        | Histidine                   |
| 38 | Ile        | Amino acids        | Isoleucine                  |
| 39 | Leu        | Amino acids        | Leucine                     |
| 40 | Lys        | Amino acids        | Lysine                      |
| 41 | Met        | Amino acids        | Methionine                  |
| 42 | Phe        | Amino acids        | Phenylalanine               |
| 43 | Pro        | Amino acids        | Proline                     |
| 44 | Ser        | Amino acids        | Serine                      |
| 45 | Thr        | Amino acids        | Threonine                   |
| 46 | Trp        | Amino acids        | Tryptophan                  |
| 47 | Tyr        | Amino acids        | Tyrosine                    |
| 48 | Val        | Amino acids        | Valine                      |

|    |                    |                           |                              |
|----|--------------------|---------------------------|------------------------------|
| 49 | GCA                | Bile acids                | Glycocholic acid             |
| 50 | GCDCA              | Bile acids                | Glycochenodeoxy-cholic acid  |
| 51 | GDCA               | Bile acids                | Glycodeoxycholic acid        |
| 52 | TCA                | Bile acids                | Taurocholic acid             |
| 53 | TCDCA              | Bile acids                | Taurochenodeoxy-cholic acid  |
| 54 | TDCA               | Bile acids                | Taurodeoxycholic acid        |
| 55 | TLCA               | Bile acids                | Taurolithocholic acid        |
| 56 | beta-Ala           | Biogenic amines           | beta-Alanine                 |
| 57 | GABA               | Biogenic amines           | gamma-Amino-butyric acid     |
| 58 | Putrescine         | Biogenic amines           | Putrescine                   |
| 59 | Serotonin          | Biogenic amines           | Serotonin                    |
| 60 | Spermidine         | Biogenic amines           | Spermidine                   |
| 61 | Spermine           | Biogenic amines           | Spermine                     |
| 62 | Hexose             | Carbohydrates and related | Hexose                       |
| 63 | AconAcid           | Carboxylic acids          | Aconitic acid                |
| 64 | HipAcid            | Carboxylic acids          | Hippuric acid                |
| 65 | Lac                | Carboxylic acids          | Lactic acid                  |
| 66 | OH-GlutAcid        | Carboxylic acids          | Hydroxyglutaric acid         |
| 67 | Suc                | Carboxylic acids          | Succinic acid                |
| 68 | CerP d18:1/16:0    | Ceramides                 | Ceramide phosphate           |
| 69 | Cer d18:1/14:0     | Ceramides                 | Ceramide d18:1/14:0          |
| 70 | Cer d18:1/16:0     | Ceramides                 | Ceramide d18:1/16:0          |
| 71 | Cer d18:1/18:0     | Ceramides                 | Ceramide d18:1/18:0          |
| 72 | Cer d18:1/20:0-OH  | Ceramides                 | Ceramide d18:1/20:0-OH       |
| 73 | Cer d18:1/22:0     | Ceramides                 | Ceramide d18:1/22:0          |
| 74 | Cer d18:1/24:0     | Ceramides                 | Ceramide d18:1/24:0          |
| 75 | Cer d18:1/24:1     | Ceramides                 | Ceramide d18:1/24:1          |
| 76 | Cer d18:2/16:0     | Ceramides                 | Ceramide d18:2/16:0          |
| 77 | CE 14:0            | Cholesteryl esters        | Cholesteryl ester 14:0       |
| 78 | CE 16:0            | Cholesteryl esters        | Cholesteryl ester 16:0       |
| 79 | CE 16:1            | Cholesteryl esters        | Cholesteryl ester 16:1       |
| 80 | CE 18:1            | Cholesteryl esters        | Cholesteryl ester 18:1       |
| 81 | p-Cresol-SO4       | Cresols                   | p-Cresol sulfate             |
| 82 | DG 14:0_14:0       | Diglycerides              | Diacylglyceride 14:0_14:0    |
| 83 | DG 14:0_20:0       | Diglycerides              | Diacylglyceride 14:0_20:0    |
| 84 | DG 16:0_16:1       | Diglycerides              | Diacylglyceride 16:0_16:1    |
| 85 | DG 16:0_18:1       | Diglycerides              | Diacylglyceride 16:0_18:1    |
| 86 | DG 16:1_18:1       | Diglycerides              | Diacylglyceride 16:1_18:1    |
| 87 | DG 18:1_18:1       | Diglycerides              | Diacylglyceride 18:1_18:1    |
| 88 | Hex2Cer d18:1/16:0 | Dihexosyl-ceramides       | Dihexosylceramide d18:1/16:0 |
| 89 | Hex2Cer d18:1/18:0 | Dihexosyl-ceramides       | Dihexosylceramide d18:1/18:0 |
| 90 | Hex2Cer d18:1/24:1 | Dihexosyl-ceramides       | Dihexosylceramide d18:1/24:1 |
| 91 | FA 22:6            | Fatty acids               | Docosahexaenoic acid         |
| 92 | Hex-Cer d18:1/14:0 | Hexosylceramides          | Hexosylceramide d18:1/14:0   |
| 93 | Hex-Cer d18:1/16:0 | Hexosylceramides          | Hexosylceramide d18:1/16:0   |
| 94 | Hex-Cer d18:1/18:0 | Hexosylceramides          | Hexosylceramide d18:1/18:0   |
| 95 | Hex-Cer d18:1/20:0 | Hexosylceramides          | Hexosylceramide d18:1/20:0   |
| 96 | Hex-Cer d18:1/22:0 | Hexosylceramides          | Hexosylceramide d18:1/22:0   |
| 97 | Hex-Cer d18:1/23:0 | Hexosylceramides          | Hexosylceramide d18:1/23:0   |
| 98 | Hex-Cer d18:1/24:0 | Hexosylceramides          | Hexosylceramide d18:1/24:0   |

|     |                    |                            |                                |
|-----|--------------------|----------------------------|--------------------------------|
| 99  | Hex-Cer d18:1/24:1 | Hexosylceramides           | Hexosylceramide d18:1/24:1     |
| 100 | Hex-Cer d18:1/26:1 | Hexosylceramides           | Hexosylceramide d18:1/26:1     |
| 101 | Hex-Cer d18:2/16:0 | Hexosylceramides           | Hexosylceramide d18:2/16:0     |
| 102 | Hex-Cer d18:2/18:0 | Hexosylceramides           | Hexosylceramide d18:2/18:0     |
| 103 | Hex-Cer d18:2/22:0 | Hexosylceramides           | Hexosylceramide d18:2/22:0     |
| 104 | Hex-Cer d18:2/24:0 | Hexosylceramides           | Hexosylceramide d18:2/24:0     |
| 105 | 3-IAA              | Indoles and derivatives    | Indoleacetic acid              |
| 106 | LPC 16:0           | Lysophosphatidyl-cholines  | Lysophosphatidyl-choline 16:0  |
| 107 | LPC 16:1           | Lysophosphatidyl-cholines  | Lysophosphatidyl-choline 16:1  |
| 108 | LPC 17:0           | Lysophosphatidyl-cholines  | Lysophosphatidyl-choline 17:0  |
| 109 | LPC 18:0           | Lysophosphatidyl-cholines  | Lysophosphatidyl-choline 18:0  |
| 110 | LPC 18:1           | Lysophosphatidyl-cholines  | Lysophosphatidyl-choline 18:1  |
| 111 | LPC 18:2           | Lysophosphatidyl-cholines  | Lysophosphatidyl-choline 18:2  |
| 112 | LPC 20:4           | Lysophosphatidyl-cholines  | Lysophosphatidyl-choline 20:4  |
| 113 | LPC 26:0           | Lysophosphatidyl-cholines  | Lysophosphatidyl-choline 26:0  |
| 114 | LPE 14:0           | Lysophosphatidyl-          | Lysophosphatidyl-              |
| 115 | LPE 16:0           | Lysophosphatidyl-          | Lysophosphatidyl-              |
| 116 | LPE 16:1           | Lysophosphatidyl-          | Lysophosphatidyl-              |
| 117 | LPE 17:1           | Lysophosphatidyl-          | Lysophosphatidyl-              |
| 118 | LPE 18:0           | Lysophosphatidyl-          | Lysophosphatidyl-              |
| 119 | LPE 18:1           | Lysophosphatidyl-          | Lysophosphatidyl-              |
| 120 | LPE 18:2           | Lysophosphatidyl-          | Lysophosphatidyl-              |
| 121 | LPE 19:1           | Lysophosphatidyl-          | Lysophosphatidyl-              |
| 122 | LPE 20:1           | Lysophosphatidyl-          | Lysophosphatidyl-              |
| 123 | LPE 20:2           | Lysophosphatidyl-          | Lysophosphatidyl-              |
| 124 | LPE 20:3           | Lysophosphatidyl-          | Lysophosphatidyl-              |
| 125 | LPE 20:4           | Lysophosphatidyl-          | Lysophosphatidyl-              |
| 126 | LPE 20:5           | Lysophosphatidyl-          | Lysophosphatidyl-              |
| 127 | LPE 22:1           | Lysophosphatidyl-          | Lysophosphatidyl-              |
| 128 | LPE 22:4           | Lysophosphatidyl-          | Lysophosphatidyl-              |
| 129 | LPE 22:5           | Lysophosphatidyl-          | Lysophosphatidyl-              |
| 130 | LPE 22:6           | Lysophosphatidyl-          | Lysophosphatidyl-              |
| 131 | LPE P-16:0         | Lysophosphatidyl-          | Lysophosphatidyl-              |
| 132 | LPE P-17:0         | Lysophosphatidyl-          | Lysophosphatidyl-              |
| 133 | LPE P-18:0         | Lysophosphatidyl-          | Lysophosphatidyl-              |
| 134 | LPE P-18:1         | Lysophosphatidyl-          | Lysophosphatidyl-              |
| 135 | LPE P-20:0         | Lysophosphatidyl-          | Lysophosphatidyl-              |
| 136 | LPG 16:1           | Lysophosphatidyl-glycerols | Lysophosphatidyl-glycerol      |
| 137 | LPG 18:1           | Lysophosphatidyl-glycerols | Lysophosphatidyl-glycerol      |
| 138 | LPI 18:0           | Lysophosphatidyl-inositols | Lysophosphatidyl-inositol 18:0 |
| 139 | LPI 18:1           | Lysophosphatidyl-inositols | Lysophosphatidyl-inositol 18:1 |
| 140 | LPS 16:0           | Lysophosphatidyl-serines   | Lysophosphatidyl-serine 16:0   |
| 141 | LPS 18:0           | Lysophosphatidyl-serines   | Lysophosphatidyl-serine 18:0   |
| 142 | LPS 18:1           | Lysophosphatidyl-serines   | Lysophosphatidyl-serine 18:1   |
| 143 | MG 16:1            | Monoglycerides             | Monoglyceride 16:1             |
| 144 | MG 20:4            | Monoglycerides             | Monoglyceride 20:4             |
| 145 | Hypoxanthine       | Nucleobases and related    | Hypoxanthine                   |
| 146 | Xanthine           | Nucleobases and related    | Xanthine                       |
| 147 | PA 17:1_18:1       | Phosphatidic acids         | Phosphatidic acid (17:1_18:1)  |
| 148 | PA 18:0_18:1       | Phosphatidic acids         | Phosphatidic acid (18:0_18:1)  |

|     |              |                       |                               |
|-----|--------------|-----------------------|-------------------------------|
| 149 | PA 18:0_18:2 | Phosphatidic acids    | Phosphatidic acid (18:0_18:2) |
| 150 | PA 18:1_18:1 | Phosphatidic acids    | Phosphatidic acid (18:1_18:1) |
| 151 | PA 18:1_20:0 | Phosphatidic acids    | Phosphatidic acid (18:1_20:0) |
| 152 | PA 18:1_20:1 | Phosphatidic acids    | Phosphatidic acid (18:1_20:1) |
| 153 | PA 18:1_20:2 | Phosphatidic acids    | Phosphatidic acid (18:1_20:2) |
| 154 | PA 18:2_18:3 | Phosphatidic acids    | Phosphatidic acid (18:2_18:3) |
| 155 | PA 18:2_20:0 | Phosphatidic acids    | Phosphatidic acid (18:2_20:0) |
| 156 | PA 18:2_20:1 | Phosphatidic acids    | Phosphatidic acid (18:2_20:1) |
| 157 | PA 20:0_20:4 | Phosphatidic acids    | Phosphatidic acid (20:0_20:4) |
| 158 | PC 24:0      | Phosphatidyl-cholines | Phosphatidyl-choline 24:0     |
| 159 | PC 28:1      | Phosphatidyl-cholines | Phosphatidyl-choline 28:1     |
| 160 | PC 30:0      | Phosphatidyl-cholines | Phosphatidyl-choline 30:0     |
| 161 | PC 30:2      | Phosphatidyl-cholines | Phosphatidyl-choline 30:2     |
| 162 | PC 32:0      | Phosphatidyl-cholines | Phosphatidyl-choline 32:0     |
| 163 | PC 32:1      | Phosphatidyl-cholines | Phosphatidyl-choline 32:1     |
| 164 | PC 32:2      | Phosphatidyl-cholines | Phosphatidyl-choline 32:2     |
| 165 | PC 32:3      | Phosphatidyl-cholines | Phosphatidyl-choline 32:3     |
| 166 | PC 34:1      | Phosphatidyl-cholines | Phosphatidyl-choline 34:1     |
| 167 | PC 34:2      | Phosphatidyl-cholines | Phosphatidyl-choline 34:2     |
| 168 | PC 34:3      | Phosphatidyl-cholines | Phosphatidyl-choline 34:3     |
| 169 | PC 34:4      | Phosphatidyl-cholines | Phosphatidyl-choline 34:4     |
| 170 | PC 36:0      | Phosphatidyl-cholines | Phosphatidyl-choline 36:0     |
| 171 | PC 36:1      | Phosphatidyl-cholines | Phosphatidyl-choline 36:1     |
| 172 | PC 36:2      | Phosphatidyl-cholines | Phosphatidyl-choline 36:2     |
| 173 | PC 36:3      | Phosphatidyl-cholines | Phosphatidyl-choline 36:3     |
| 174 | PC 36:4      | Phosphatidyl-cholines | Phosphatidyl-choline 36:4     |
| 175 | PC 36:5      | Phosphatidyl-cholines | Phosphatidyl-choline 36:5     |
| 176 | PC 36:6      | Phosphatidyl-cholines | Phosphatidyl-choline 36:6     |
| 177 | PC 38:0      | Phosphatidyl-cholines | Phosphatidyl-choline 38:0     |
| 178 | PC 38:1      | Phosphatidyl-cholines | Phosphatidyl-choline 38:1     |
| 179 | PC 38:3      | Phosphatidyl-cholines | Phosphatidyl-choline 38:3     |
| 180 | PC 38:4      | Phosphatidyl-cholines | Phosphatidyl-choline 38:4     |
| 181 | PC 38:5      | Phosphatidyl-cholines | Phosphatidyl-choline 38:5     |
| 182 | PC 38:6      | Phosphatidyl-cholines | Phosphatidyl-choline 38:6     |
| 183 | PC 40:2      | Phosphatidyl-cholines | Phosphatidyl-choline 40:2     |
| 184 | PC 40:3      | Phosphatidyl-cholines | Phosphatidyl-choline 40:3     |
| 185 | PC 40:4      | Phosphatidyl-cholines | Phosphatidyl-choline 40:4     |
| 186 | PC 40:5      | Phosphatidyl-cholines | Phosphatidyl-choline 40:5     |
| 187 | PC 40:6      | Phosphatidyl-cholines | Phosphatidyl-choline 40:6     |
| 188 | PC 42:2      | Phosphatidyl-cholines | Phosphatidyl-choline 42:2     |
| 189 | PC 42:5      | Phosphatidyl-cholines | Phosphatidyl-choline 42:5     |
| 190 | PC O-28:0    | Phosphatidyl-cholines | Phosphatidyl-choline O-28:0   |
| 191 | PC O-28:1    | Phosphatidyl-cholines | Phosphatidyl-choline O-28:1   |
| 192 | PC O-30:0    | Phosphatidyl-cholines | Phosphatidyl-choline O-30:0   |
| 193 | PC O-30:1    | Phosphatidyl-cholines | Phosphatidyl-choline O-30:1   |
| 194 | PC O-32:1    | Phosphatidyl-cholines | Phosphatidyl-choline O-32:1   |
| 195 | PC O-32:2    | Phosphatidyl-cholines | Phosphatidyl-choline O-32:2   |
| 196 | PC O-34:0    | Phosphatidyl-cholines | Phosphatidyl-choline O-34:0   |
| 197 | PC O-34:1    | Phosphatidyl-cholines | Phosphatidyl-choline O-34:1   |
| 198 | PC O-34:2    | Phosphatidyl-cholines | Phosphatidyl-choline O-34:2   |

|     |           |                            |                             |
|-----|-----------|----------------------------|-----------------------------|
| 199 | PC O-34:3 | Phosphatidyl-cholines      | Phosphatidyl-choline O-34:3 |
| 200 | PC O-36:0 | Phosphatidyl-cholines      | Phosphatidyl-choline O-36:0 |
| 201 | PC O-36:1 | Phosphatidyl-cholines      | Phosphatidyl-choline O-36:1 |
| 202 | PC O-36:2 | Phosphatidyl-cholines      | Phosphatidyl-choline O-36:2 |
| 203 | PC O-36:3 | Phosphatidyl-cholines      | Phosphatidyl-choline O-36:3 |
| 204 | PC O-36:4 | Phosphatidyl-cholines      | Phosphatidyl-choline O-36:4 |
| 205 | PC O-36:5 | Phosphatidyl-cholines      | Phosphatidyl-choline O-36:5 |
| 206 | PC O-38:0 | Phosphatidyl-cholines      | Phosphatidyl-choline O-38:0 |
| 207 | PC O-38:1 | Phosphatidyl-cholines      | Phosphatidyl-choline O-38:1 |
| 208 | PC O-38:2 | Phosphatidyl-cholines      | Phosphatidyl-choline O-38:2 |
| 209 | PC O-38:3 | Phosphatidyl-cholines      | Phosphatidyl-choline O-38:3 |
| 210 | PC O-38:4 | Phosphatidyl-cholines      | Phosphatidyl-choline O-38:4 |
| 211 | PC O-38:5 | Phosphatidyl-cholines      | Phosphatidyl-choline O-38:5 |
| 212 | PC O-38:6 | Phosphatidyl-cholines      | Phosphatidyl-choline O-38:6 |
| 213 | PC O-40:1 | Phosphatidyl-cholines      | Phosphatidyl-choline O-40:1 |
| 214 | PC O-40:2 | Phosphatidyl-cholines      | Phosphatidyl-choline O-40:2 |
| 215 | PC O-40:3 | Phosphatidyl-cholines      | Phosphatidyl-choline O-40:3 |
| 216 | PC O-40:4 | Phosphatidyl-cholines      | Phosphatidyl-choline O-40:4 |
| 217 | PC O-40:5 | Phosphatidyl-cholines      | Phosphatidyl-choline O-40:5 |
| 218 | PC O-40:6 | Phosphatidyl-cholines      | Phosphatidyl-choline O-40:6 |
| 219 | PC O-42:1 | Phosphatidyl-cholines      | Phosphatidyl-choline O-42:1 |
| 220 | PC O-42:2 | Phosphatidyl-cholines      | Phosphatidyl-choline O-42:2 |
| 221 | PC O-42:3 | Phosphatidyl-cholines      | Phosphatidyl-choline O-42:3 |
| 222 | PE 28:0   | Phosphatidyl-ethanolamines | Phosphatidyl-ethanolamine   |
| 223 | PE 28:1   | Phosphatidyl-ethanolamines | Phosphatidyl-ethanolamine   |
| 224 | PE 30:0   | Phosphatidyl-ethanolamines | Phosphatidyl-ethanolamine   |
| 225 | PE 30:1   | Phosphatidyl-ethanolamines | Phosphatidyl-ethanolamine   |
| 226 | PE 31:0   | Phosphatidyl-ethanolamines | Phosphatidyl-ethanolamine   |
| 227 | PE 32:0   | Phosphatidyl-ethanolamines | Phosphatidyl-ethanolamine   |
| 228 | PE 32:1   | Phosphatidyl-ethanolamines | Phosphatidyl-ethanolamine   |
| 229 | PE 32:2   | Phosphatidyl-ethanolamines | Phosphatidyl-ethanolamine   |
| 230 | PE 33:0   | Phosphatidyl-ethanolamines | Phosphatidyl-ethanolamine   |
| 231 | PE 33:1   | Phosphatidyl-ethanolamines | Phosphatidyl-ethanolamine   |
| 232 | PE 33:2   | Phosphatidyl-ethanolamines | Phosphatidyl-ethanolamine   |
| 233 | PE 34:0   | Phosphatidyl-ethanolamines | Phosphatidyl-ethanolamine   |
| 234 | PE 34:1   | Phosphatidyl-ethanolamines | Phosphatidyl-ethanolamine   |
| 235 | PE 34:2   | Phosphatidyl-ethanolamines | Phosphatidyl-ethanolamine   |
| 236 | PE 34:3   | Phosphatidyl-ethanolamines | Phosphatidyl-ethanolamine   |
| 237 | PE 34:4   | Phosphatidyl-ethanolamines | Phosphatidyl-ethanolamine   |
| 238 | PE 35:1   | Phosphatidyl-ethanolamines | Phosphatidyl-ethanolamine   |
| 239 | PE 35:2   | Phosphatidyl-ethanolamines | Phosphatidyl-ethanolamine   |
| 240 | PE 35:3   | Phosphatidyl-ethanolamines | Phosphatidyl-ethanolamine   |
| 241 | PE 36:0   | Phosphatidyl-ethanolamines | Phosphatidyl-ethanolamine   |
| 242 | PE 36:1   | Phosphatidyl-ethanolamines | Phosphatidyl-ethanolamine   |
| 243 | PE 36:2   | Phosphatidyl-ethanolamines | Phosphatidyl-ethanolamine   |
| 244 | PE 36:3   | Phosphatidyl-ethanolamines | Phosphatidyl-ethanolamine   |
| 245 | PE 36:4   | Phosphatidyl-ethanolamines | Phosphatidyl-ethanolamine   |
| 246 | PE 36:5   | Phosphatidyl-ethanolamines | Phosphatidyl-ethanolamine   |
| 247 | PE 36:6   | Phosphatidyl-ethanolamines | Phosphatidyl-ethanolamine   |
| 248 | PE 38:0   | Phosphatidyl-ethanolamines | Phosphatidyl-ethanolamine   |





|     |                |                            |                           |
|-----|----------------|----------------------------|---------------------------|
| 299 | PE P-18:0/22:6 | Phosphatidyl-ethanolamines | Phosphatidyl-ethanolamine |
| 300 | PE P-18:1/18:1 | Phosphatidyl-ethanolamines | Phosphatidyl-ethanolamine |
| 301 | PE P-18:1/18:2 | Phosphatidyl-ethanolamines | Phosphatidyl-ethanolamine |
| 302 | PE P-18:1/20:4 | Phosphatidyl-ethanolamines | Phosphatidyl-ethanolamine |
| 303 | PE P-18:1/20:5 | Phosphatidyl-ethanolamines | Phosphatidyl-ethanolamine |
| 304 | PE P-18:1/22:6 | Phosphatidyl-ethanolamines | Phosphatidyl-ethanolamine |
| 305 | PE P-20:0/14:0 | Phosphatidyl-ethanolamines | Phosphatidyl-ethanolamine |
| 306 | PE P-20:0/16:0 | Phosphatidyl-ethanolamines | Phosphatidyl-ethanolamine |
| 307 | PE P-20:0/16:1 | Phosphatidyl-ethanolamines | Phosphatidyl-ethanolamine |
| 308 | PE P-20:0/18:1 | Phosphatidyl-ethanolamines | Phosphatidyl-ethanolamine |
| 309 | PE P-20:0/18:2 | Phosphatidyl-ethanolamines | Phosphatidyl-ethanolamine |
| 310 | PE P-20:0/20:4 | Phosphatidyl-ethanolamines | Phosphatidyl-ethanolamine |
| 311 | PE P-20:0/20:5 | Phosphatidyl-ethanolamines | Phosphatidyl-ethanolamine |
| 312 | PG 16:0_16:0   | Phosphatidyl-glycerols     | Phosphatidyl-glycerol     |
| 313 | PG 16:0_16:1   | Phosphatidyl-glycerols     | Phosphatidyl-glycerol     |
| 314 | PG 16:0_18:1   | Phosphatidyl-glycerols     | Phosphatidyl-glycerol     |
| 315 | PG 16:0_18:2   | Phosphatidyl-glycerols     | Phosphatidyl-glycerol     |
| 316 | PG 16:0_19:1   | Phosphatidyl-glycerols     | Phosphatidyl-glycerol     |
| 317 | PG 16:0_20:3   | Phosphatidyl-glycerols     | Phosphatidyl-glycerol     |
| 318 | PG 16:0_20:4   | Phosphatidyl-glycerols     | Phosphatidyl-glycerol     |
| 319 | PG 16:0_20:5   | Phosphatidyl-glycerols     | Phosphatidyl-glycerol     |
| 320 | PG 16:1_16:1   | Phosphatidyl-glycerols     | Phosphatidyl-glycerol     |
| 321 | PG 16:1_18:1   | Phosphatidyl-glycerols     | Phosphatidyl-glycerol     |
| 322 | PG 16:1_20:4   | Phosphatidyl-glycerols     | Phosphatidyl-glycerol     |
| 323 | PG 16:2_18:1   | Phosphatidyl-glycerols     | Phosphatidyl-glycerol     |
| 324 | PG 16:2_18:2   | Phosphatidyl-glycerols     | Phosphatidyl-glycerol     |
| 325 | PG 16:3_18:1   | Phosphatidyl-glycerols     | Phosphatidyl-glycerol     |
| 326 | PG 17:0_18:1   | Phosphatidyl-glycerols     | Phosphatidyl-glycerol     |
| 327 | PG 17:1_18:1   | Phosphatidyl-glycerols     | Phosphatidyl-glycerol     |
| 328 | PG 18:0_18:1   | Phosphatidyl-glycerols     | Phosphatidyl-glycerol     |
| 329 | PG 18:1_18:1   | Phosphatidyl-glycerols     | Phosphatidyl-glycerol     |
| 330 | PG 18:1_18:2   | Phosphatidyl-glycerols     | Phosphatidyl-glycerol     |
| 331 | PG 18:1_20:0   | Phosphatidyl-glycerols     | Phosphatidyl-glycerol     |
| 332 | PG 18:1_20:1   | Phosphatidyl-glycerols     | Phosphatidyl-glycerol     |
| 333 | PG 18:1_20:2   | Phosphatidyl-glycerols     | Phosphatidyl-glycerol     |
| 334 | PG 18:1_20:3   | Phosphatidyl-glycerols     | Phosphatidyl-glycerol     |
| 335 | PG 18:1_20:4   | Phosphatidyl-glycerols     | Phosphatidyl-glycerol     |
| 336 | PG 18:1_20:5   | Phosphatidyl-glycerols     | Phosphatidyl-glycerol     |
| 337 | PG 18:1_22:0   | Phosphatidyl-glycerols     | Phosphatidyl-glycerol     |
| 338 | PG 18:1_22:1   | Phosphatidyl-glycerols     | Phosphatidyl-glycerol     |
| 339 | PG 18:1_22:2   | Phosphatidyl-glycerols     | Phosphatidyl-glycerol     |
| 340 | PG 18:1_22:3   | Phosphatidyl-glycerols     | Phosphatidyl-glycerol     |
| 341 | PG 18:1_22:4   | Phosphatidyl-glycerols     | Phosphatidyl-glycerol     |
| 342 | PG 18:1_22:5   | Phosphatidyl-glycerols     | Phosphatidyl-glycerol     |
| 343 | PI 14:0_18:1   | Phosphatidyl-inositols     | Phosphatidyl-inositol     |
| 344 | PI 15:0_16:0   | Phosphatidyl-inositols     | Phosphatidyl-inositol     |
| 345 | PI 15:1_16:0   | Phosphatidyl-inositols     | Phosphatidyl-inositol     |
| 346 | PI 16:0_16:0   | Phosphatidyl-inositols     | Phosphatidyl-inositol     |
| 347 | PI 16:0_17:2   | Phosphatidyl-inositols     | Phosphatidyl-inositol     |
| 348 | PI 16:0_18:1   | Phosphatidyl-inositols     | Phosphatidyl-inositol     |

|     |              |                               |                             |
|-----|--------------|-------------------------------|-----------------------------|
| 349 | PI 16:0_20:4 | Phosphatidyl-inositols        | Phosphatidyl-inositol       |
| 350 | PI 16:1_18:0 | Phosphatidyl-inositols        | Phosphatidyl-inositol       |
| 351 | PI 16:1_18:1 | Phosphatidyl-inositols        | Phosphatidyl-inositol       |
| 352 | PI 17:1_18:1 | Phosphatidyl-inositols        | Phosphatidyl-inositol       |
| 353 | PI 18:0_18:0 | Phosphatidyl-inositols        | Phosphatidyl-inositol       |
| 354 | PI 18:0_18:1 | Phosphatidyl-inositols        | Phosphatidyl-inositol       |
| 355 | PI 18:0_18:2 | Phosphatidyl-inositols        | Phosphatidyl-inositol       |
| 356 | PI 18:0_20:3 | Phosphatidyl-inositols        | Phosphatidyl-inositol       |
| 357 | PI 18:0_20:4 | Phosphatidyl-inositols        | Phosphatidyl-inositol       |
| 358 | PI 18:1_18:1 | Phosphatidyl-inositols        | Phosphatidyl-inositol       |
| 359 | PI 18:1_18:2 | Phosphatidyl-inositols        | Phosphatidyl-inositol       |
| 360 | PI 18:1_20:1 | Phosphatidyl-inositols        | Phosphatidyl-inositol       |
| 361 | PI 18:1_20:2 | Phosphatidyl-inositols        | Phosphatidyl-inositol       |
| 362 | PI 18:1_20:3 | Phosphatidyl-inositols        | Phosphatidyl-inositol       |
| 363 | PI 18:1_20:4 | Phosphatidyl-inositols        | Phosphatidyl-inositol       |
| 364 | PI 18:1_22:1 | Phosphatidyl-inositols        | Phosphatidyl-inositol       |
| 365 | PI 18:1_22:6 | Phosphatidyl-inositols        | Phosphatidyl-inositol       |
| 366 | PS 32:0      | Phosphatidyl-serines          | Phosphatidyl-serine 32:0    |
| 367 | PS 34:1      | Phosphatidyl-serines          | Phosphatidyl-serine 34:1    |
| 368 | PS 34:2      | Phosphatidyl-serines          | Phosphatidyl-serine 34:2    |
| 369 | PS 36:1      | Phosphatidyl-serines          | Phosphatidyl-serine 36:1    |
| 370 | PS 36:2      | Phosphatidyl-serines          | Phosphatidyl-serine 36:2    |
| 371 | PS 36:3      | Phosphatidyl-serines          | Phosphatidyl-serine 36:3    |
| 372 | PS 36:4      | Phosphatidyl-serines          | Phosphatidyl-serine 36:4    |
| 373 | PS 36:5      | Phosphatidyl-serines          | Phosphatidyl-serine 36:5    |
| 374 | PS 38:4      | Phosphatidyl-serines          | Phosphatidyl-serine 38:4    |
| 375 | PS 38:5      | Phosphatidyl-serines          | Phosphatidyl-serine 38:5    |
| 376 | PS 38:6      | Phosphatidyl-serines          | Phosphatidyl-serine 38:6    |
| 377 | PS 38:7      | Phosphatidyl-serines          | Phosphatidyl-serine 38:7    |
| 378 | PS 40:4      | Phosphatidyl-serines          | Phosphatidyl-serine 40:4    |
| 379 | PS 40:5      | Phosphatidyl-serines          | Phosphatidyl-serine 40:5    |
| 380 | PS 40:6      | Phosphatidyl-serines          | Phosphatidyl-serine 40:6    |
| 381 | PS 40:7      | Phosphatidyl-serines          | Phosphatidyl-serine 40:7    |
| 382 | PS 40:8      | Phosphatidyl-serines          | Phosphatidyl-serine 40:8    |
| 383 | SPBP d14:1   | Sphinganine and sphingosine   | Sphingosine phosphate d14:1 |
| 384 | SPBP d17:0   | Sphinganine and sphingosine   | Sphinganine phosphate d17:0 |
| 385 | SPBP d18:1   | Sphinganine and sphingosine   | Sphingosine phosphate d18:1 |
| 386 | SPB d14:0    | Sphinganines and sphingosines | Sphinganine d14:0           |
| 387 | SPB d18:0    | Sphinganines and sphingosines | Sphinganine d18:0           |
| 388 | SPB d18:1    | Sphinganines and sphingosines | Sphingosine d18:1           |
| 389 | SM 33:1      | Sphingomyelins                | Sphingomyelin 33:1          |
| 390 | SM 34:1      | Sphingomyelins                | Sphingomyelin 34:1          |
| 391 | SM 34:2      | Sphingomyelins                | Sphingomyelin 34:2          |
| 392 | SM 35:1      | Sphingomyelins                | Sphingomyelin 35:1          |
| 393 | SM 36:1      | Sphingomyelins                | Sphingomyelin 36:1          |
| 394 | SM 36:2      | Sphingomyelins                | Sphingomyelin 36:2          |
| 395 | SM 41:1      | Sphingomyelins                | Sphingomyelin 41:1          |
| 396 | SM 41:2      | Sphingomyelins                | Sphingomyelin 41:2          |
| 397 | SM 42:1      | Sphingomyelins                | Sphingomyelin 42:1          |
| 398 | SM 42:2      | Sphingomyelins                | Sphingomyelin 42:2          |

|     |              |                        |                            |
|-----|--------------|------------------------|----------------------------|
| 399 | TG 14:0_34:0 | Triglycerides          | Triacylglyceride 14:0_34:0 |
| 400 | TG 14:0_34:1 | Triglycerides          | Triacylglyceride 14:0_34:1 |
| 401 | TG 14:0_36:1 | Triglycerides          | Triacylglyceride 14:0_36:1 |
| 402 | TG 14:0_36:2 | Triglycerides          | Triacylglyceride 14:0_36:2 |
| 403 | TG 14:0_36:3 | Triglycerides          | Triacylglyceride 14:0_36:3 |
| 404 | TG 16:0_32:0 | Triglycerides          | Triacylglyceride 16:0_32:0 |
| 405 | TG 16:0_32:1 | Triglycerides          | Triacylglyceride 16:0_32:1 |
| 406 | TG 16:0_33:1 | Triglycerides          | Triacylglyceride 16:0_33:1 |
| 407 | TG 16:0_34:0 | Triglycerides          | Triacylglyceride 16:0_34:0 |
| 408 | TG 16:0_34:1 | Triglycerides          | Triacylglyceride 16:0_34:1 |
| 409 | TG 16:0_34:2 | Triglycerides          | Triacylglyceride 16:0_34:2 |
| 410 | TG 16:0_35:1 | Triglycerides          | Triacylglyceride 16:0_35:1 |
| 411 | TG 16:0_35:2 | Triglycerides          | Triacylglyceride 16:0_35:2 |
| 412 | TG 16:0_35:3 | Triglycerides          | Triacylglyceride 16:0_35:3 |
| 413 | TG 16:0_36:2 | Triglycerides          | Triacylglyceride 16:0_36:2 |
| 414 | TG 16:1_28:0 | Triglycerides          | Triacylglyceride 16:1_28:0 |
| 415 | TG 16:1_32:0 | Triglycerides          | Triacylglyceride 16:1_32:0 |
| 416 | TG 16:1_32:1 | Triglycerides          | Triacylglyceride 16:1_32:1 |
| 417 | TG 16:1_33:1 | Triglycerides          | Triacylglyceride 16:1_33:1 |
| 418 | TG 16:1_34:0 | Triglycerides          | Triacylglyceride 16:1_34:0 |
| 419 | TG 16:1_34:1 | Triglycerides          | Triacylglyceride 16:1_34:1 |
| 420 | TG 16:1_34:2 | Triglycerides          | Triacylglyceride 16:1_34:2 |
| 421 | TG 16:1_36:2 | Triglycerides          | Triacylglyceride 16:1_36:2 |
| 422 | TG 17:0_34:2 | Triglycerides          | Triacylglyceride 17:0_34:2 |
| 423 | TG 17:0_34:3 | Triglycerides          | Triacylglyceride 17:0_34:3 |
| 424 | TG 17:1_34:1 | Triglycerides          | Triacylglyceride 17:1_34:1 |
| 425 | TG 17:1_34:3 | Triglycerides          | Triacylglyceride 17:1_34:3 |
| 426 | TG 18:0_30:0 | Triglycerides          | Triacylglyceride 18:0_30:0 |
| 427 | TG 18:0_32:1 | Triglycerides          | Triacylglyceride 18:0_32:1 |
| 428 | TG 18:1_30:0 | Triglycerides          | Triacylglyceride 18:1_30:0 |
| 429 | TG 18:1_30:1 | Triglycerides          | Triacylglyceride 18:1_30:1 |
| 430 | TG 18:1_32:0 | Triglycerides          | Triacylglyceride 18:1_32:0 |
| 431 | TG 18:1_32:1 | Triglycerides          | Triacylglyceride 18:1_32:1 |
| 432 | TG 18:1_32:2 | Triglycerides          | Triacylglyceride 18:1_32:2 |
| 433 | TG 18:1_33:0 | Triglycerides          | Triacylglyceride 18:1_33:0 |
| 434 | TG 18:1_33:1 | Triglycerides          | Triacylglyceride 18:1_33:1 |
| 435 | TG 18:1_33:2 | Triglycerides          | Triacylglyceride 18:1_33:2 |
| 436 | TG 18:1_33:3 | Triglycerides          | Triacylglyceride 18:1_33:3 |
| 437 | TG 18:1_34:1 | Triglycerides          | Triacylglyceride 18:1_34:1 |
| 438 | TG 18:1_34:2 | Triglycerides          | Triacylglyceride 18:1_34:2 |
| 439 | TG 18:1_36:2 | Triglycerides          | Triacylglyceride 18:1_36:2 |
| 440 | TG 18:2_33:2 | Triglycerides          | Triacylglyceride 18:2_33:2 |
| 441 | TG 20:1_24:3 | Triglycerides          | Triacylglyceride 20:1_24:3 |
| 442 | TG 20:1_31:0 | Triglycerides          | Triacylglyceride 20:1_31:0 |
| 443 | Choline      | Vitamins and cofactors | Choline                    |

**Table S2 Not Shown.** The metabolic role (according to Biocrates Life Sciences) of the indicators shown in the corresponding line within Table 1.

|    |                                                                                                                                                                                                                                                                                                                                                             |
|----|-------------------------------------------------------------------------------------------------------------------------------------------------------------------------------------------------------------------------------------------------------------------------------------------------------------------------------------------------------------|
| 1  | Short-Chain Acyl-Coenzyme A Dehydrogenase (SCAD) Deficiency (NBS) is reported as Indicator of short-chain acyl-CoA dehydrogenase deficiency, a rare genetic condition that prevents the body from converting short-chain fatty acids into <u>energy</u> .                                                                                                   |
| 2  | Lactate Dehydrogenase Activity is reported as an indicator of fermentation. Under hypoxic conditions, pyruvate is reduced by lactate dehydrogenase into lactate. In tumor cells, glucose is converted into pyruvate and further into lactate, even under sufficient oxygen conditions.                                                                      |
| 3  | Isobutyryl-Coenzyme A Dehydrogenase Deficiency (NBS) is reported as an indicator of isobutyryl-CoA dehydrogenase deficiency, a condition that disrupts the breakdown of the amino acid valine.                                                                                                                                                              |
| 5  | Asparagine Synthesis is reported as Indicator of asparagine synthetase activity, an endogenous enzyme which catalyzes asparagine synthesis from aspartate. This enzyme has been described as a new potential biomarker of ovarian cancer and its downregulation has been shown to induce cell cycle arrest and inhibit cell proliferation of breast cancer. |
| 6  | Putrescine Synthesis is reported as indicator of ornithine decarboxylase activity, the rate-limiting enzyme in the polyamine synthesis decarboxylating ornithine to putrescine.                                                                                                                                                                             |
| 8  | Polyamine Synthesis is reported as indicator of polyamine synthesis. First, ornithine is decarboxylated to putrescine by the rate-limiting enzyme ornithine decarboxylase, which is then further converted to spermidine and spermine by spermidine synthase and spermine synthase, respectively.                                                           |
| 9  | Sarcosine Synthesis from Choline is reported as indicator of sarcosine synthesis from choline. High levels of sarcosine have been shown to slightly reduce the risk of prostate cancer.                                                                                                                                                                     |
| 10 | Glutaminolysis Rate is indicator of glutaminolysis rate, which is often markedly altered in cancer.                                                                                                                                                                                                                                                         |
| 12 | Betaine Synthesis is indicator of betaine synthesis from choline. Betaine acts as a methyl donor by carrying and donating methyl groups to facilitate chemical processes, e.g. for proper liver function, cellular replication, and detoxification reactions. Betaine insufficiency is associated with metabolic syndrome, lipid disorders and diabetes.    |
| 18 | 2-Methylbutyrylglycinuria (NBS) is Indicator of 2-methylbutyrylglycinuria, an inherited disorder that affects the catabolism of the amino acid isoleucine.                                                                                                                                                                                                  |
| 19 | Taurine Synthesis is indicator of taurine synthesis from cysteine. Taurine is a highly abundant sulfonated amino acid in mammals and can be found in blood plasma and blood cells. It is essential for human infants and other species and plays a role in the development of central nervous, renal, cardiovascular, reproductive, and immune systems.     |
| 20 | Gamma-Aminobutyric Acid Synthesis is indicator of glutamate decarboxylase activity converting the amino acid glutamate to gamma-aminobutyric acid.                                                                                                                                                                                                          |
| 21 | Methionine Oxidation is fraction of sulfoxidized methionine relative to the unmodified methionine pool, which indicates systemic oxidative stress and biological ageing.                                                                                                                                                                                    |
| 22 | Glycine Synthesis is indicator of mitochondrial serine hydroxymethyltransferase (SHMT) activity converting serine to glycine. SHMT serves as a potential target for anti-malarial drugs and is a potential diagnostic marker for glioma and breast cancer.                                                                                                  |
| 23 | Dihydrolipoamide Dehydrogenase Deficiency (NBS) is indicator of dihydrolipoamide dehydrogenase (DLD) deficiency, an inherited disease caused by the absence of the enzyme DLD, which is responsible for the degradation of the amino acids leucine, isoleucine and valine.                                                                                  |
| 38 | Ratio of Acetylcarnitine to Carnitine is indicator of beta-oxidation rate. It is a catabolic process in which fatty acids in the mitochondria of eukaryotes are degraded to acetyl-CoA, which then enters the citric acid cycle.                                                                                                                            |
| 39 | Sum of Solely Glucogenic Amino Acids is indicator for gluconeogenic activity and endogenous glucose production.                                                                                                                                                                                                                                             |
| 41 | Sum of Non-Essential Amino Acids, indicates protein turn-over.                                                                                                                                                                                                                                                                                              |

|    |                                                                                                                                                                                                                                                                                                                                                                                                                           |
|----|---------------------------------------------------------------------------------------------------------------------------------------------------------------------------------------------------------------------------------------------------------------------------------------------------------------------------------------------------------------------------------------------------------------------------|
| 42 | Cysteine Synthesis is an indicator of cysteine synthesis from serine or methionine. Cysteine is a non-essential sulfur-containing amino acid and important for protein synthesis, detoxification and diverse metabolic functions.                                                                                                                                                                                         |
| 46 | Carnosine Synthesis is an indicator of carnosine synthesis from histidine by carnosine synthetase activity.                                                                                                                                                                                                                                                                                                               |
| 47 | Glutathione Constituents. Sum of constituents of the tripeptide glutathione (GSH), which is an antioxidant capable of preventing damage of cellular components caused by reactive oxygen species. GSH biosynthesis is facilitated in two steps: (i) glutamate cysteine ligase, the rate-limiting enzyme, fuses glutamate and cysteine, and (ii) glutathione synthetase adds glycine.                                      |
| 49 | Sum of Conjugated Primary Bile Acids. Primary bile acids (BAs) are the BAs that are synthesized in the liver and then mostly conjugated to glycine or taurine to increase solubility and make them impermeable to cell membranes. Conjugated primary BAs are significantly elevated in patients with polycystic ovary syndrome. In addition, conjugated primary BAs were found to be elevated after antibiotic treatment. |
| 51 | 51 Beta-Oxidation. Indicator of beta-oxidation rate. It is a catabolic process in which fatty acids in the mitochondria are degraded to acetyl-CoA, which then enters the citric acid cycle.                                                                                                                                                                                                                              |
| 52 | Sum of Taurine-Conjugated Bile Acids. After being synthesized from cholesterol, bile acids (BAs) are conjugated to glycine or taurine in the liver to increase solubility and make them impermeable to cell membranes. The content of taurine-conjugated BAs normally correlates with the content of glycine-conjugated BAs, unless the levels of taurine or glycine are abnormal.                                        |
| 53 | Malonic Aciduria (NBS) is an indicator of malonic aciduria, a condition that prevents the body from converting certain fats into energy.                                                                                                                                                                                                                                                                                  |
| 54 | Sum of Sulfur-Containing Amino Acids. They contribute substantially to the maintenance and integrity of cell systems by influencing the redox state and the capacity to detoxify toxic compounds, free radicals and reactive oxygen species.                                                                                                                                                                              |
| 55 | Short/Branched-Chain Acyl-Coenzyme A Dehydrogenase Deficiency (NBS) is an indicator of short/branched-chain acyl-CoA dehydrogenase deficiency, an autosomal recessive disorder of isoleucine catabolism.                                                                                                                                                                                                                  |
| 79 | Methylmalonic Acidemia (NBS) is an indicator of methylmalonic acidemia, an autosomal recessive metabolic disorder that disrupts the amino acid metabolism.                                                                                                                                                                                                                                                                |

**Table S3 Not Shown.** Numbers generating graphic depicted in Figure 8

|                   |              |              |                  |                    | Column A                              | Column B                                |
|-------------------|--------------|--------------|------------------|--------------------|---------------------------------------|-----------------------------------------|
| Microscopic field | Mean NT      | Mean Mico    | Number nuclei NT | Number nuclei Mico | NT_ Mean normalized for nuclei number | Mico_ Mean normalized for nuclei number |
| <b>Field 1</b>    | <b>18913</b> | <b>10542</b> | <b>6</b>         | <b>5</b>           | <b>3152.17</b>                        | <b>2108.40</b>                          |
| <b>Field 2</b>    | <b>12224</b> | <b>10497</b> | <b>5</b>         | <b>6</b>           | <b>2444.80</b>                        | <b>1749.50</b>                          |
| <b>Field 3</b>    | <b>14800</b> | <b>15289</b> | <b>6</b>         | <b>3</b>           | <b>2466.67</b>                        | <b>5096.33</b>                          |
| <b>Field 4</b>    | <b>16583</b> | <b>13753</b> | <b>6</b>         | <b>5</b>           | <b>2763.83</b>                        | <b>2750.60</b>                          |

|          |       |       |    |         |          |         |
|----------|-------|-------|----|---------|----------|---------|
| Field 5  | 20228 | 11007 | 5  | 7       | 4045.60  | 1572.43 |
| Field 6  | 12214 | 14653 | 9  | 3       | 1357.11  | 4884.33 |
| Field 7  | 19520 | 11566 | 6  | 5       | 3253.33  | 2313.20 |
| Field 8  | 12796 | 13322 | 8  | 5       | 1599.50  | 2664.40 |
| Field 9  | 13343 | 8928  | 4  | 3       | 3335.75  | 2976.00 |
| Field 10 | 15567 | 10412 | 6  | 6       | 2594.50  | 1735.33 |
| Field 11 | 15162 | 13633 | 3  | 14      | 5054.00  | 973.79  |
| Field 12 | 14311 | 9894  | 9  | 8       | 1590.11  | 1236.75 |
| Field 13 | 13655 | 12775 | 5  | 4       | 2731.00  | 3193.75 |
| Field 14 | 11313 | 5891  | 4  | 6       | 2828.25  | 981.83  |
| Field 15 | 7982  | 11129 | 5  | 4       | 1596.40  | 2782.25 |
| Field 16 | 24435 | 4464  | 6  | 2       | 4072.50  | 2232.00 |
| Field 17 | 36279 | 8526  | 12 | 7       | 3023.25  | 1218.00 |
| Field 18 | 17417 | 13750 | 4  | 6       | 4354.25  | 2291.67 |
| Field 19 | 21763 | 7622  | 5  | 6       | 4352.60  | 1270.33 |
| Field 20 | 37892 | 6229  | 10 | 4       | 3789.20  | 1557.25 |
| Field 21 | 18839 | 8788  | 4  | 2       | 4709.75  | 4394.00 |
| Field 22 | 34468 | 6377  | 6  | 7       | 5744.67  | 911.00  |
| Field 23 | 19627 | 5810  | 6  | 4       | 3271.17  | 1452.50 |
| Field 24 | 9327  | 13023 | 4  | 4       | 2331.75  | 3255.75 |
| Field 25 | 14830 | 9051  | 5  | 3       | 2966.00  | 3017.00 |
| Field 26 | 21577 | 11643 | 2  | 2       | 10788.50 | 5821.50 |
| Field 27 | 14047 | 17280 | 6  | 6       | 2341.17  | 2880.00 |
| Field 28 | 22969 | 12147 | 9  | 5       | 2552.11  | 2429.40 |
| Field 29 | 18548 | 13750 | 7  | 5       | 2649.71  | 2750.00 |
| Field 30 | 19147 | 4343  | 7  | 9       | 2735.29  | 482.56  |
|          |       |       |    | Mean    | 3349.83  | 2432.73 |
|          |       |       |    | Dev. st | 3152.17  | 2108.40 |

|  |  |  |  |                                                 |               |  |
|--|--|--|--|-------------------------------------------------|---------------|--|
|  |  |  |  | <b>t-Test<br/>column A<br/>vs.<br/>column B</b> | <b>0.0251</b> |  |
|--|--|--|--|-------------------------------------------------|---------------|--|
